# Supplementary material for: Influence of the physicochemical features of TiO2 nanoparticles on the formation of a protein corona and impact on cytotoxicity
Source: Royal Society of Chemistry journal article supplement (doi:10.1039/d0ra08429h), 2020-01-01

## Supplementary Information

Particle size distribution of TiO<sub>2</sub> nanoparticles (S1, S2, S3, S4 and P25) in de-ionized water (DI H<sub>2</sub>O), and in culture media (cDMEM and cRPMI) as determined by DLS.

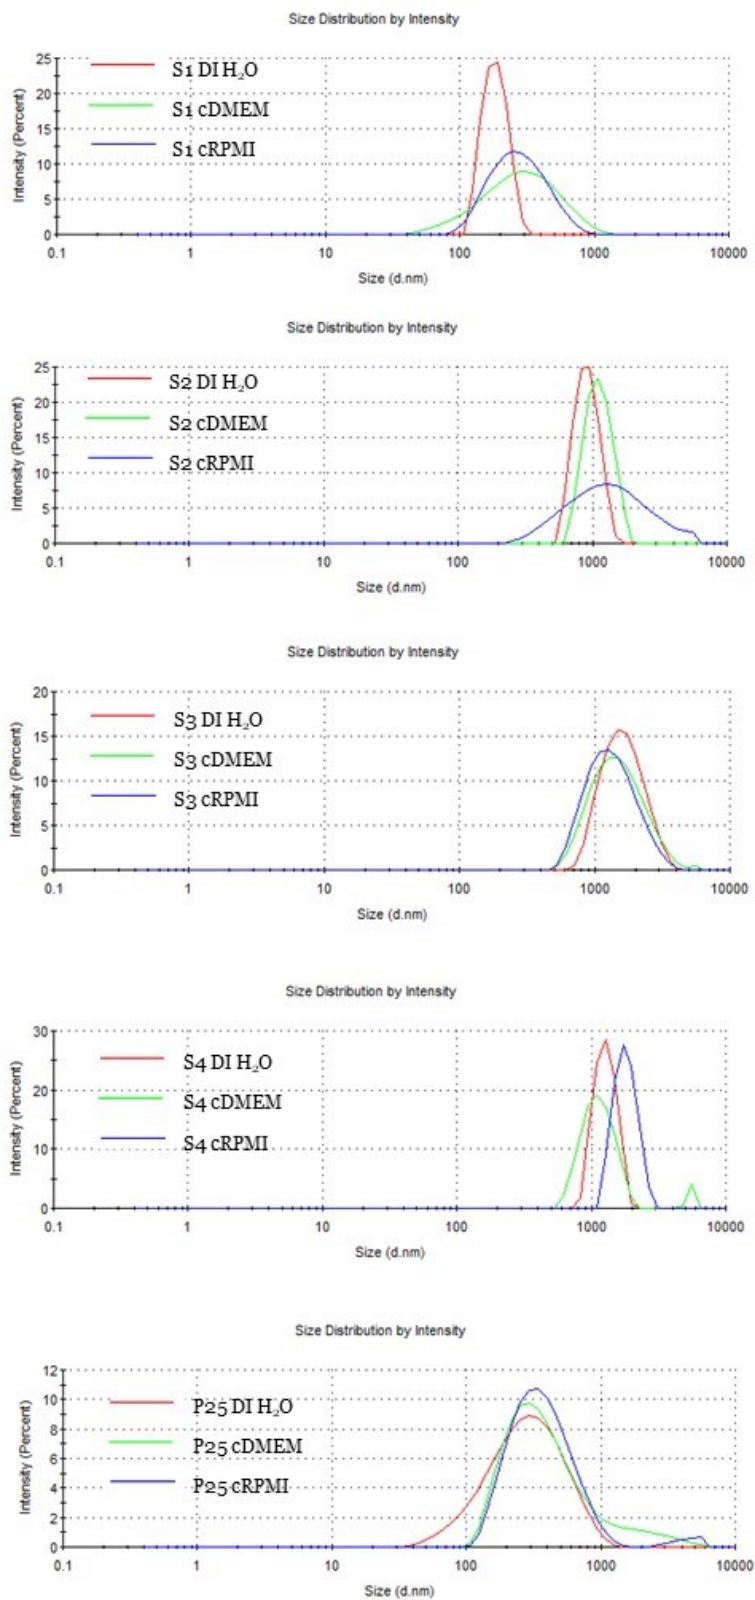

Supplement: d0ra08429h1.pdf [file d0ra08429h1.pdf]
